# Supplementary material
Source: PubMed Central journal article supplement (PMC3330828)
Supplement: NIHMS354188-supplement-1_si_001.pdf [file NIHMS354188-supplement-1_si_001.pdf]

# Supporting Information

## Caspase-1 and 3 Inhibiting Drimane Sesquiterpenoids From the Extremophilic Pit Fungus, *Penicillium solitum*

Donald B. Stierle<sup>\*\*†</sup>, Andrea A. Stierle<sup>\*†</sup>, Teri Girtsman<sup>†</sup>, Kyle MacIntyre<sup>‡</sup> and Jesse Nichols<sup>‡</sup>

*Department of Biomedical and Pharmaceutical Sciences, University of Montana*

*Missoula, Montana 59812*

<sup>††</sup>*Department of Chemistry and Geochemistry, Montana Tech of the University of Montana*

*Butte, Montana 59701*

### Table of Contents

|     |                                                                                           |
|-----|-------------------------------------------------------------------------------------------|
| S2  | <sup>1</sup> H NMR of Berkedrimane A ( <b>1</b> ), 300 MHz, CDCl <sub>3</sub>             |
| S3  | <sup>1</sup> H NMR of Berkedrimane A ( <b>1</b> ), 300 MHz, C <sub>6</sub> D <sub>6</sub> |
| S4  | <sup>13</sup> C NMR of Berkedrimane A ( <b>1</b> ), 75 MHz, CDCl <sub>3</sub>             |
| S5  | COSY of Berkedrimane A ( <b>1</b> ), 300 MHz, CDCl <sub>3</sub>                           |
| S6  | HMBC of Berkedrimane A ( <b>1</b> ), 300 MHz, CDCl <sub>3</sub>                           |
| S7  | <sup>1</sup> H NMR of Berkedrimane B ( <b>2</b> ), 300 MHz, CDCl <sub>3</sub>             |
| S8  | <sup>13</sup> C NMR of Berkedrimane B ( <b>2</b> ), 75 MHz, CDCl <sub>3</sub>             |
| S9  | COSY of Berkedrimane B ( <b>2</b> ), 300 MHz, CDCl <sub>3</sub>                           |
| S10 | HMBC of Berkedrimane B ( <b>2</b> ), 300 MHz, CDCl <sub>3</sub>                           |
| S11 | <sup>1</sup> H NMR of Trimethylester ( <b>8</b> ), 500 MHz, CDCl <sub>3</sub>             |
| S12 | <sup>13</sup> C NMR of Trimethylester ( <b>8</b> ), 75 MHz, CDCl <sub>3</sub>             |

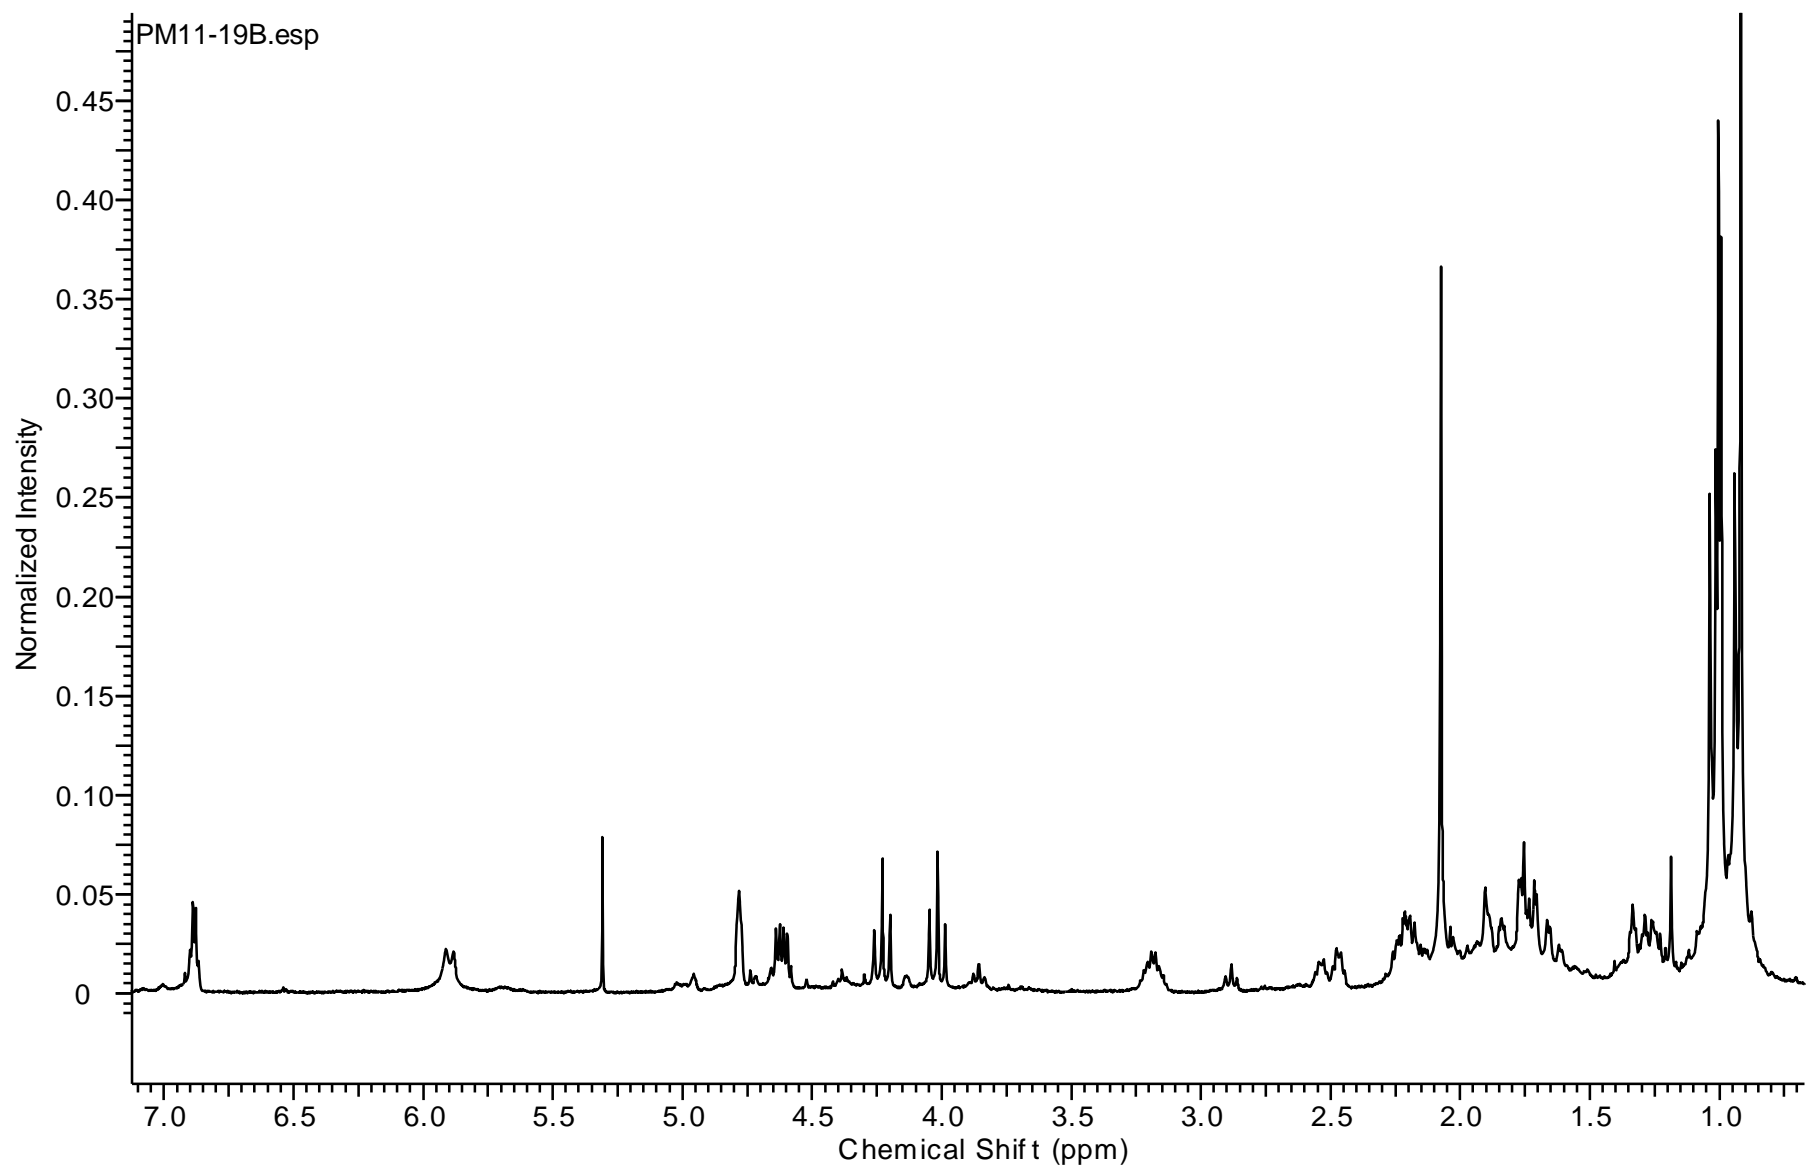

S2  $^1\text{H}$  NMR of Berkedrimane A (**1**), 300 MHz,  $\text{CDCl}_3$

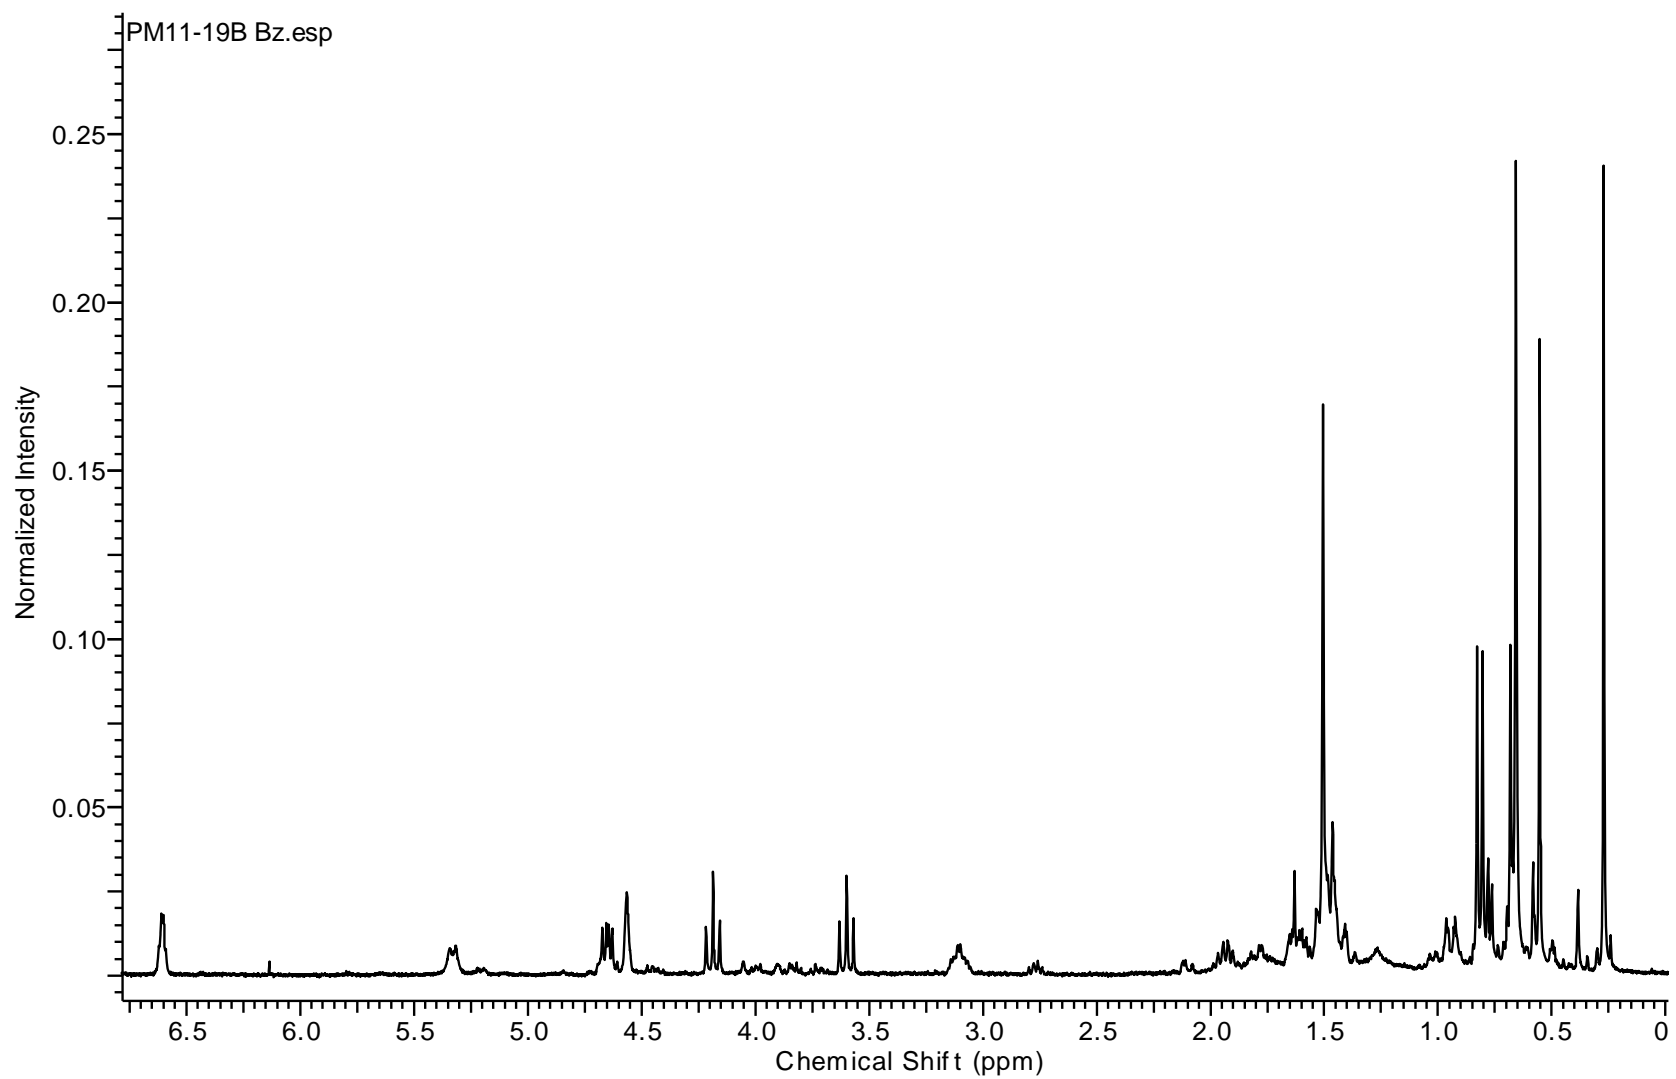

S3  $^1\text{H}$  NMR of Berkedrimane A (**1**), 300 MHz,  $\text{C}_6\text{D}_6$

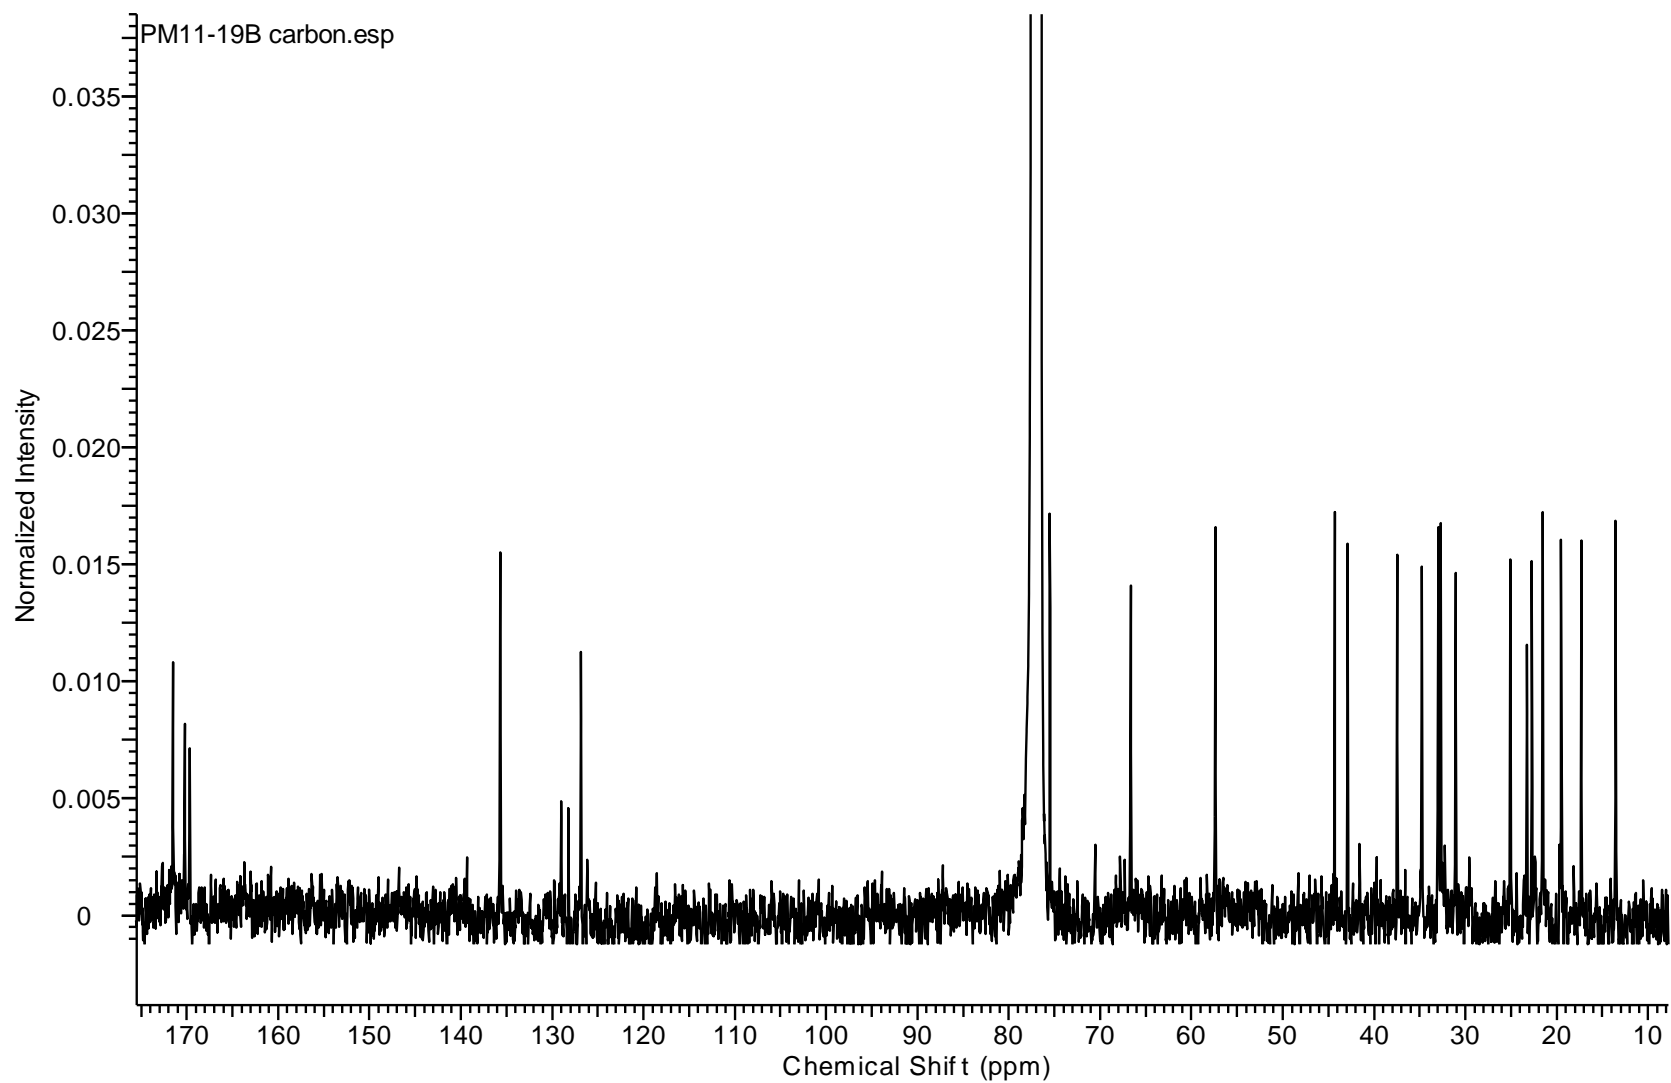

S4  $^{13}\text{C}$  NMR of Berkedrimane A (**1**), 75 MHz,  $\text{CDCl}_3$

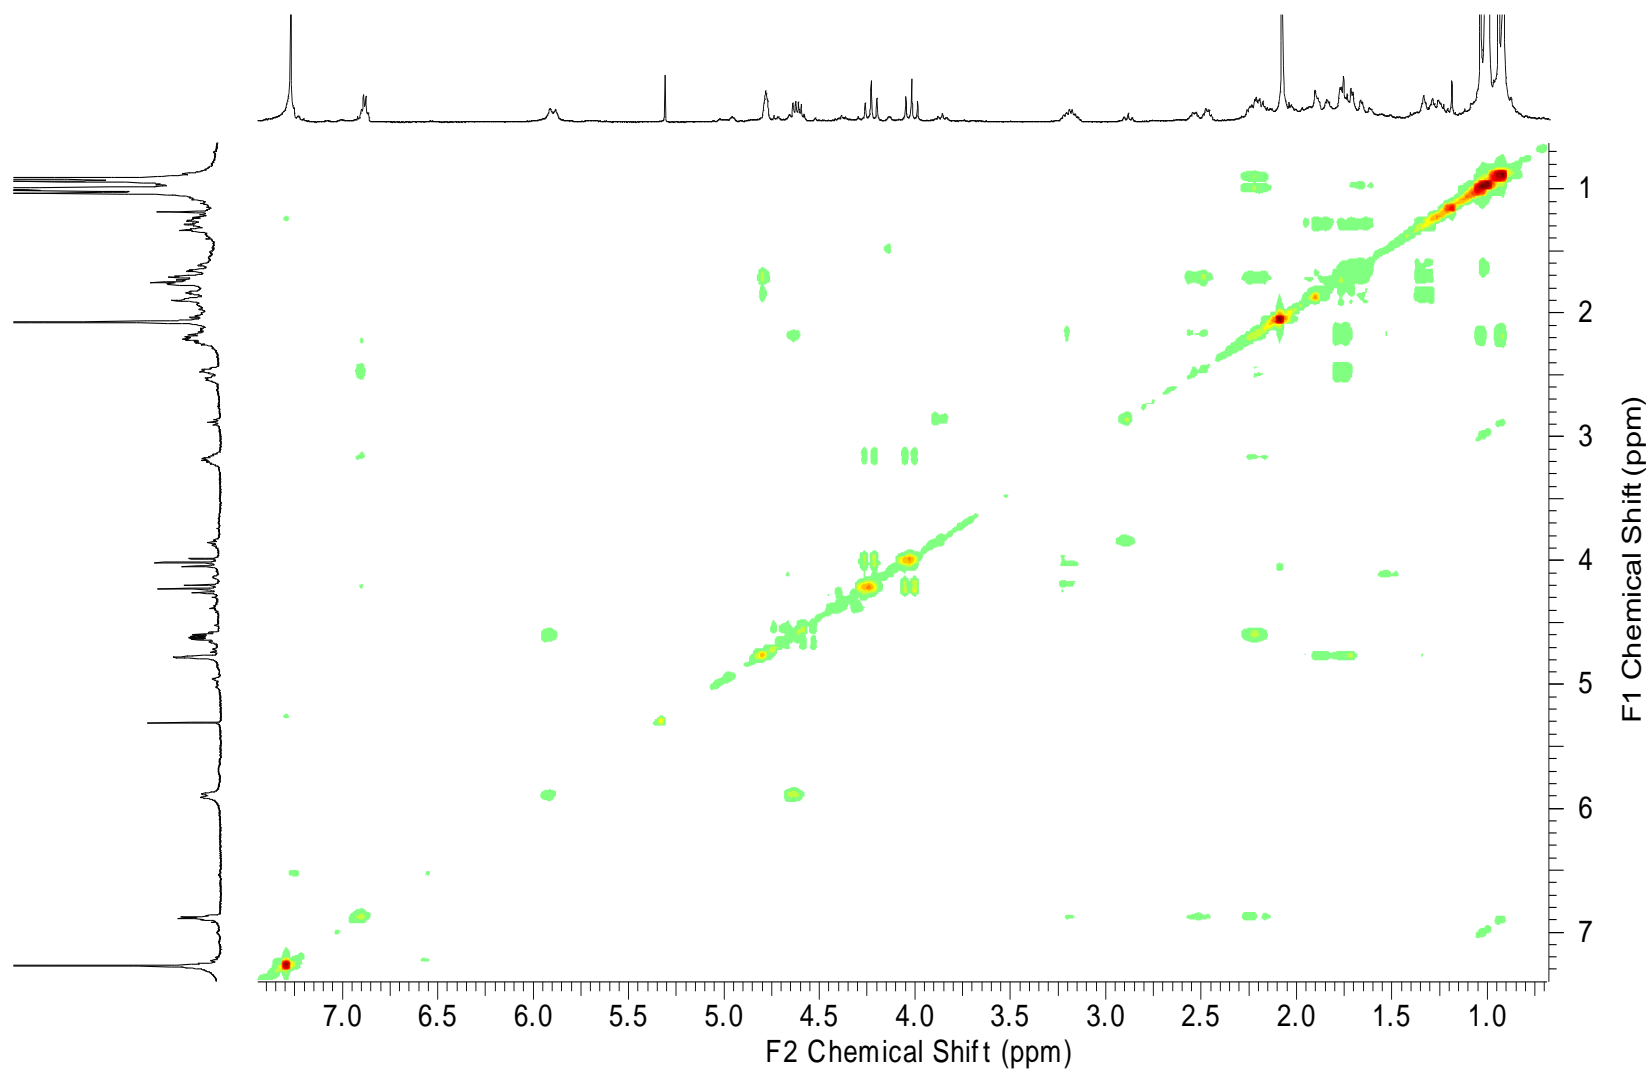

S5 COSY of Berkedrimane A (**1**), 300 MHz, CDCl<sub>3</sub>

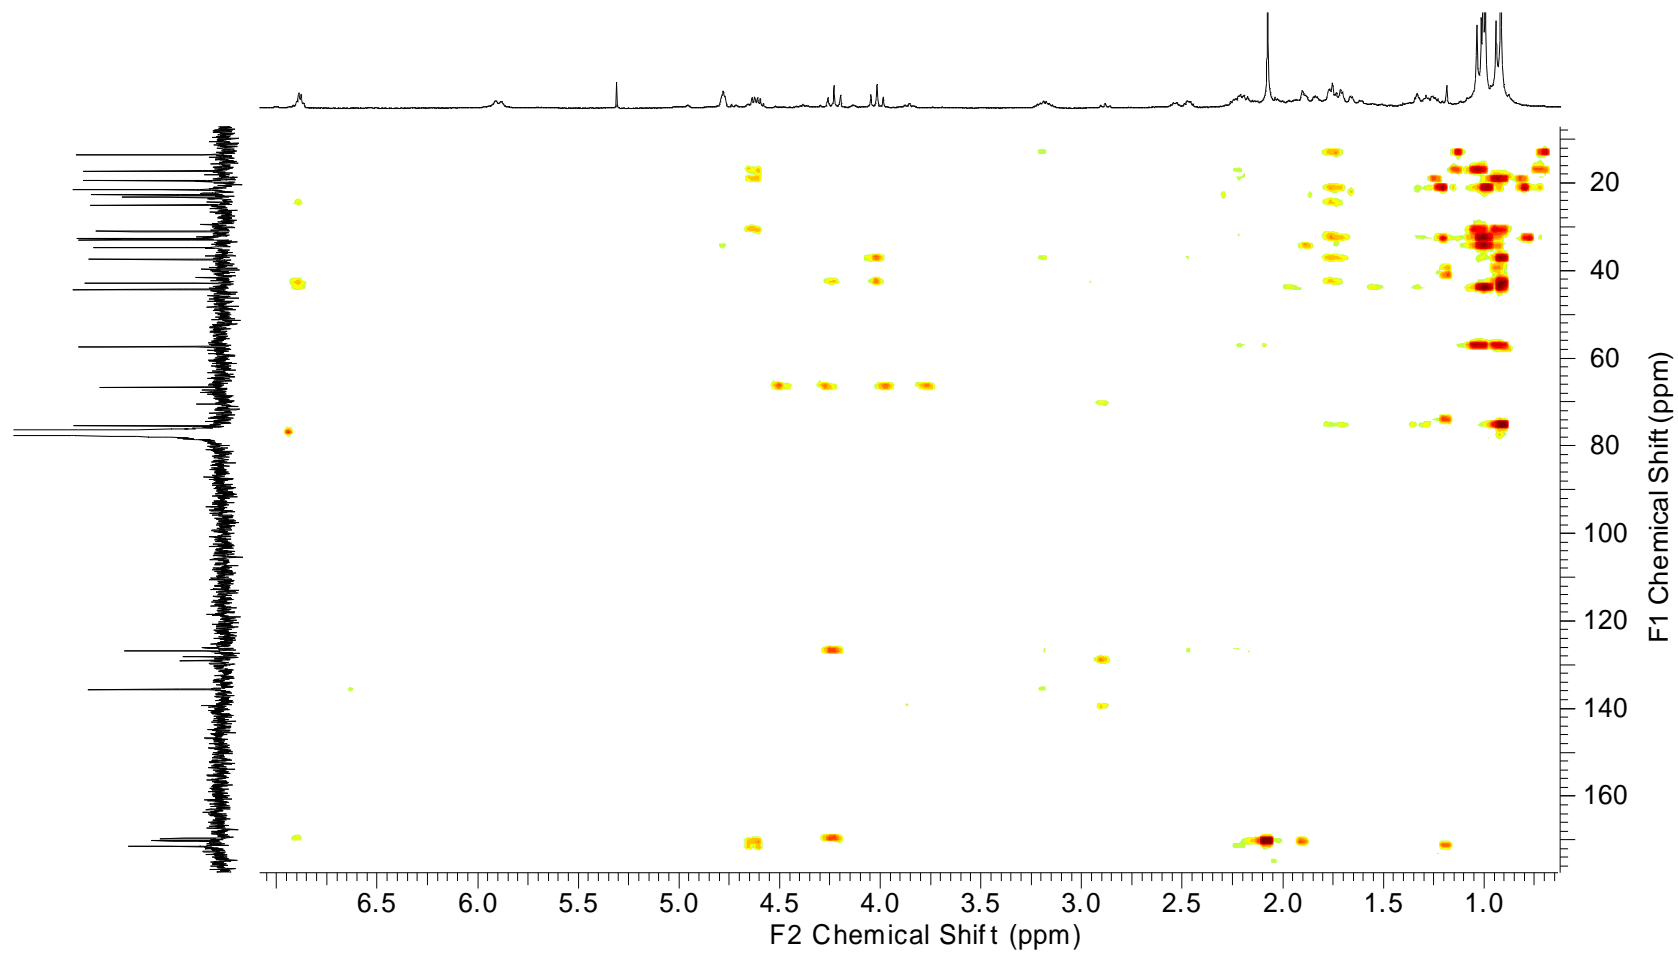

S6 HMBC of Berkedrimane A (**1**), 300 MHz, CDCl<sub>3</sub>

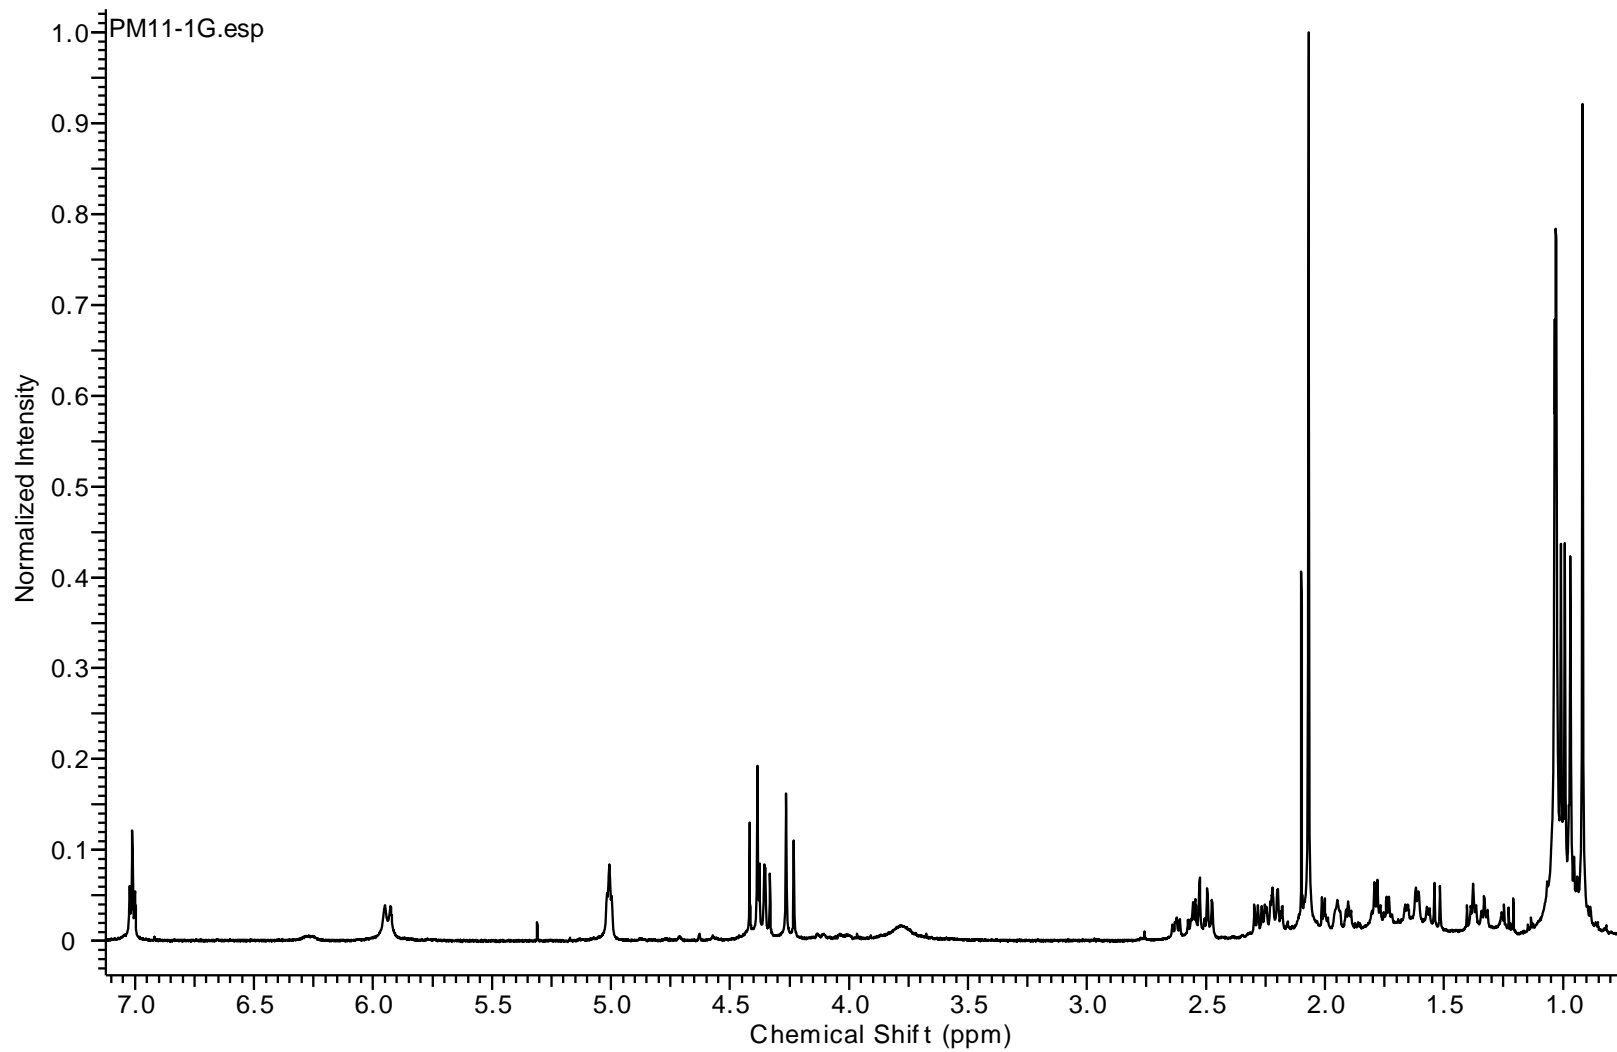

S7  $^1\text{H}$  NMR of Berkedrimane B (**2**), 300 MHz,  $\text{CDCl}_3$

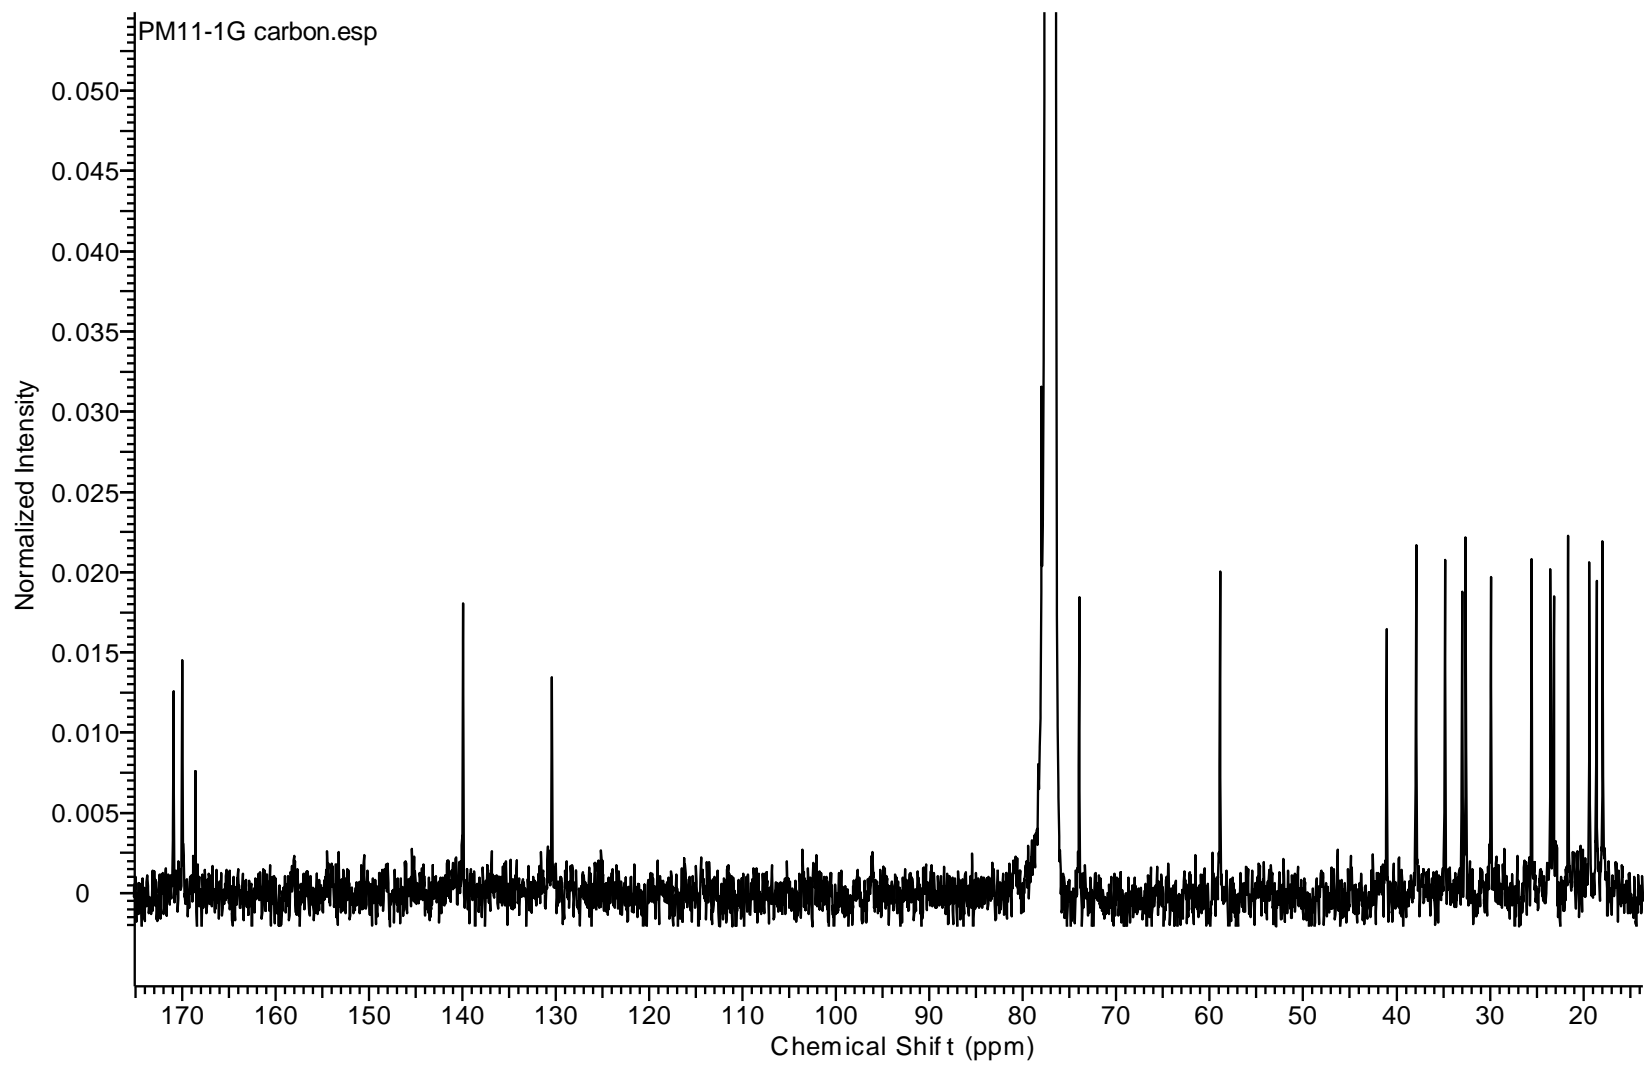

S8  $^{13}\text{C}$  NMR of Berkedrimane B (**2**), 75 MHz,  $\text{CDCl}_3$



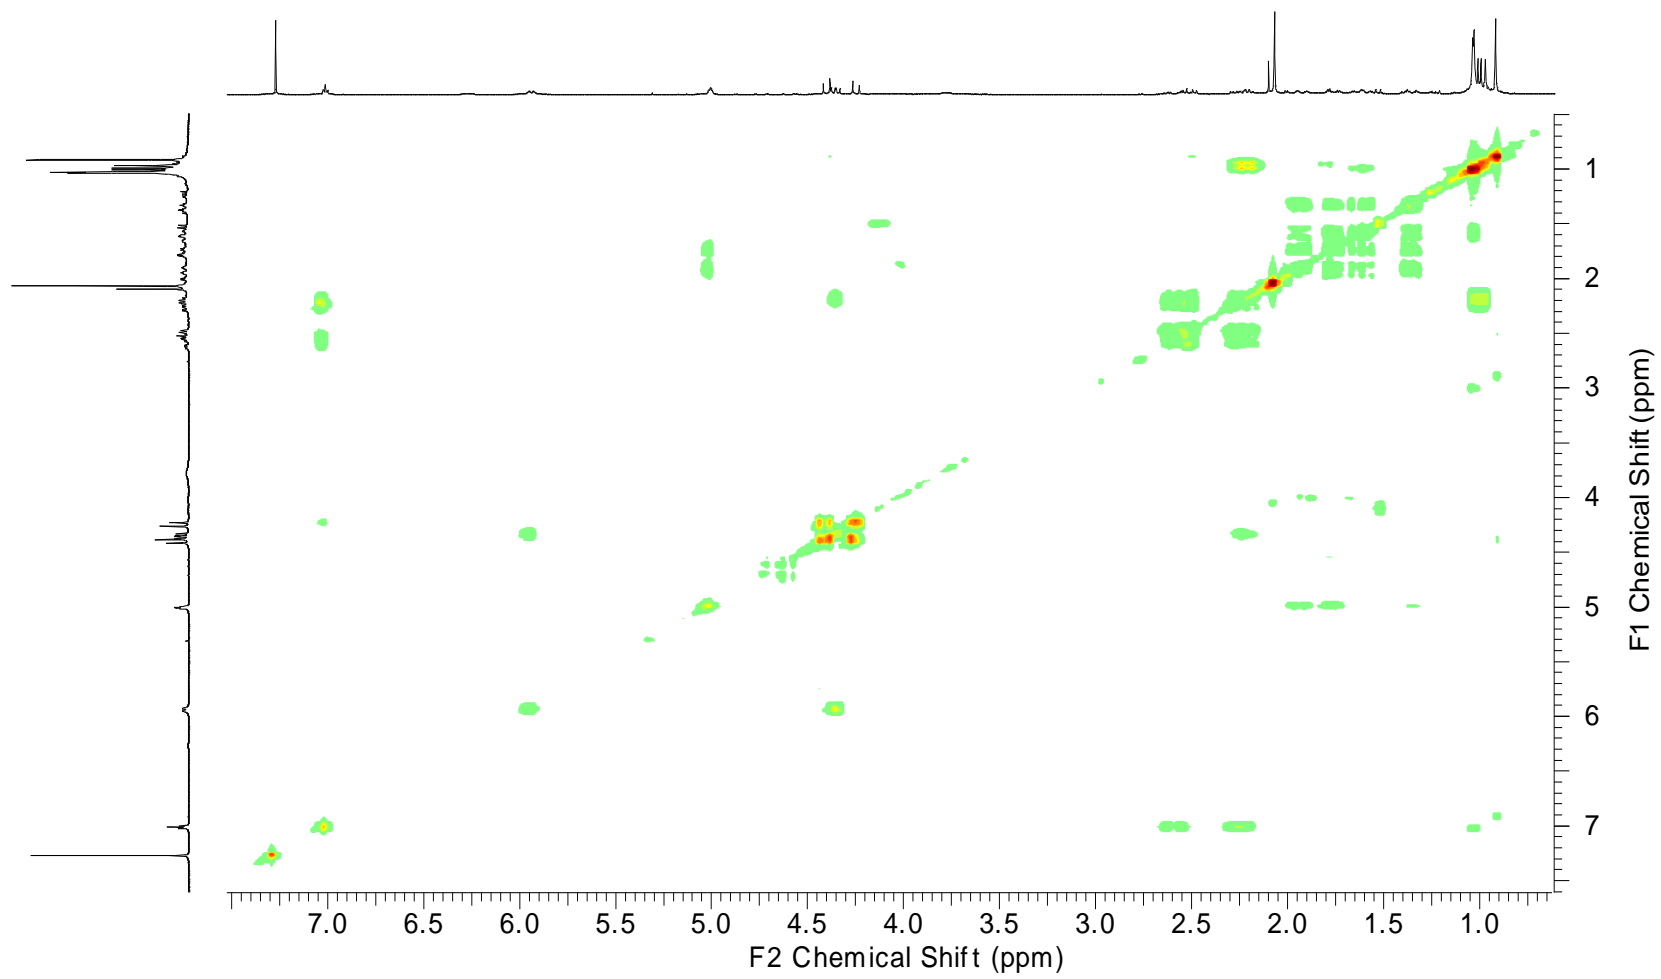

S9 COSY of Berkedrimane B (**2**), 300 MHz, CDCl<sub>3</sub>

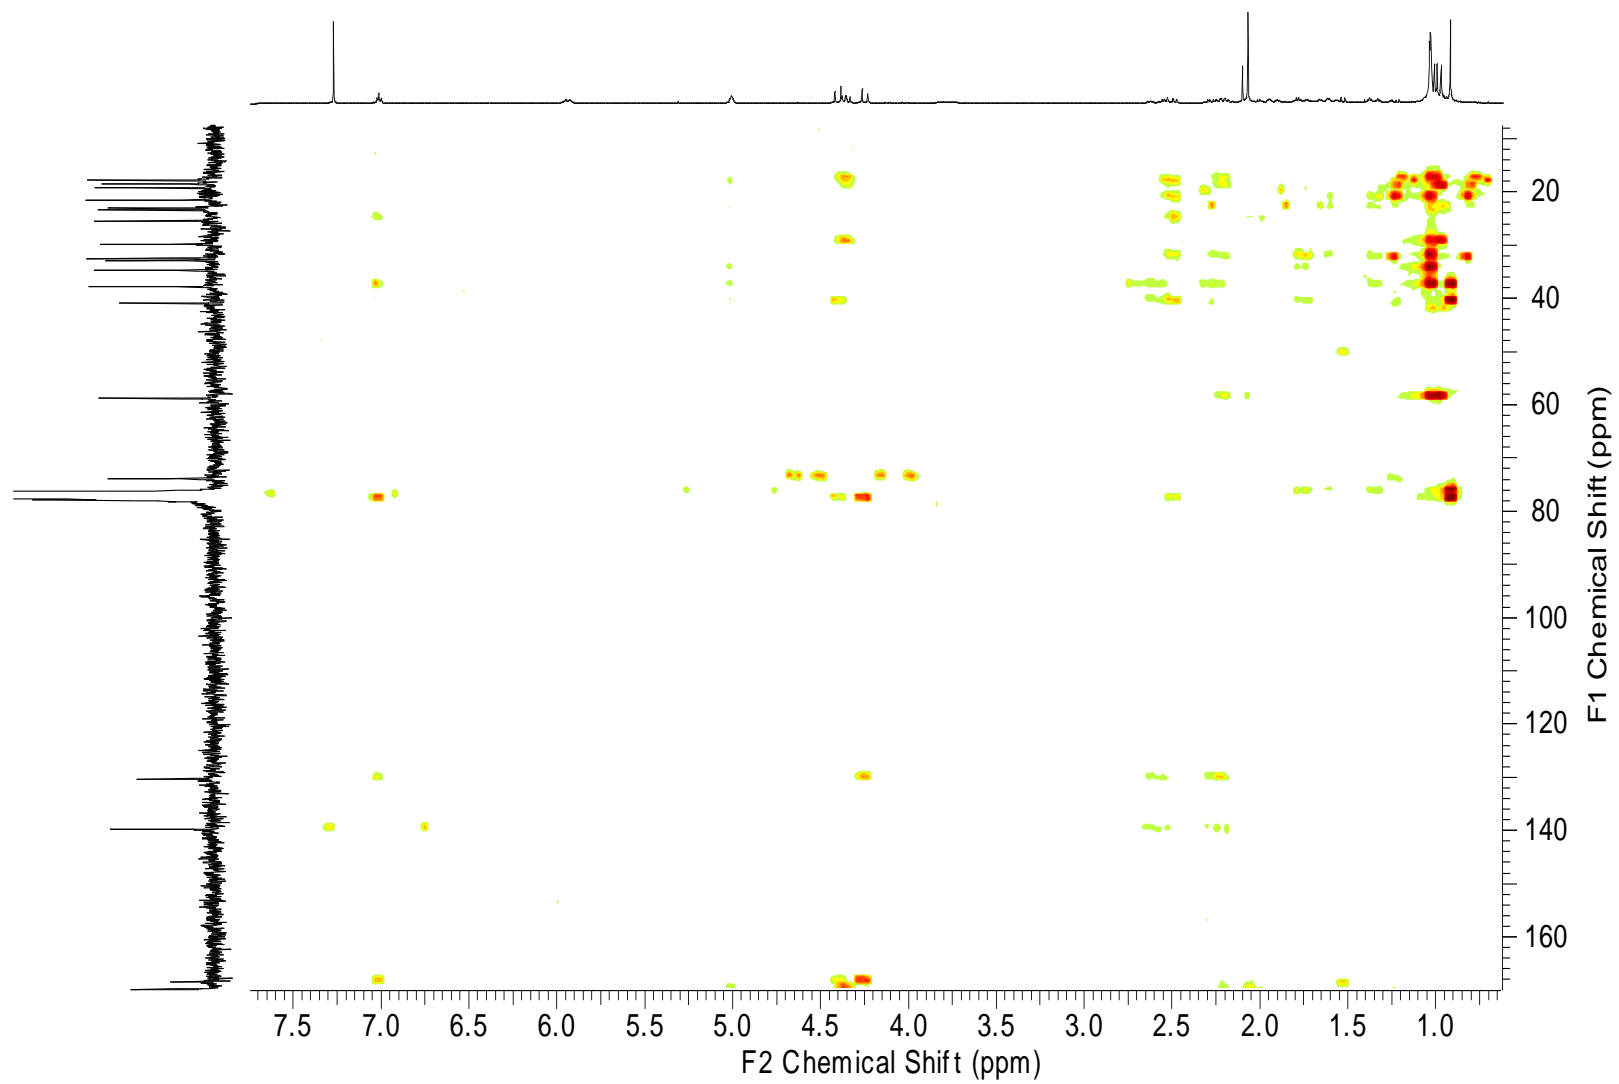

S10 HMBC of Berkedrimane B (**2**), 300 MHz, CDCl<sub>3</sub>

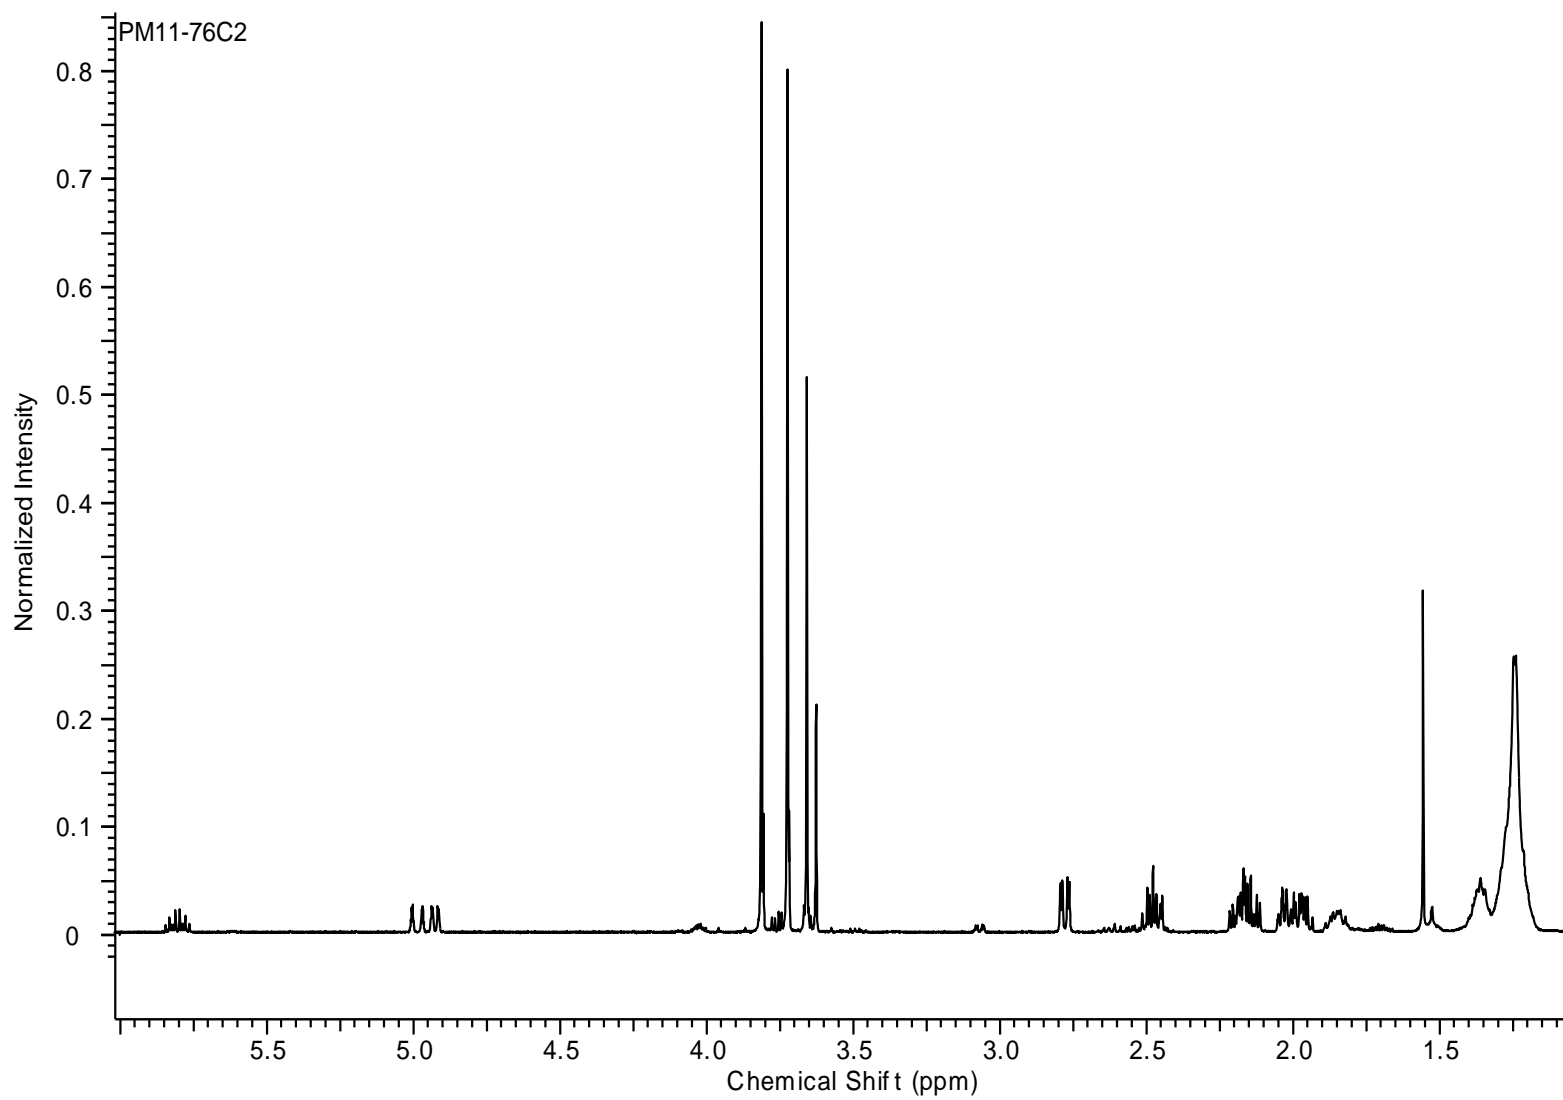

S11  $^1\text{H}$  NMR of Trimethylester (**8**), 500 MHz,  $\text{CDCl}_3$

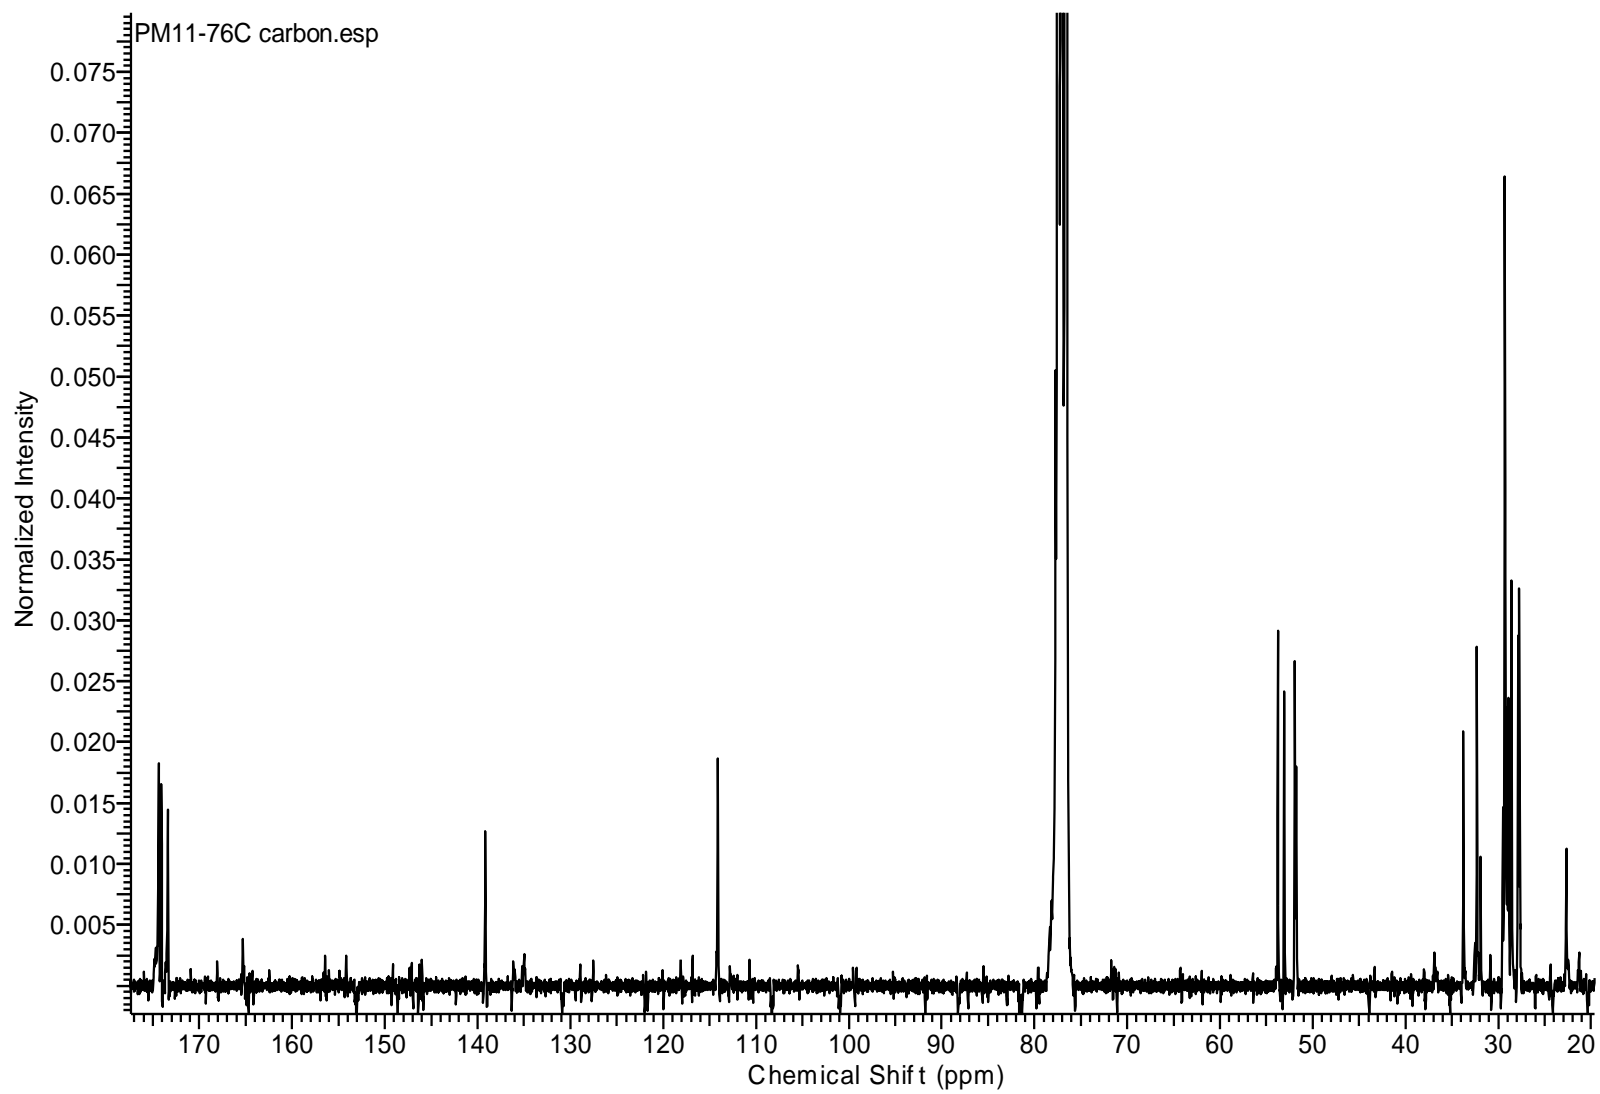

S12  $^{13}\text{C}$  NMR of Trimethylester (**8**), 75 MHz,  $\text{CDCl}_3$
